# Supplementary material for: High-Density GBS-Based Genetic Linkage Map Construction and QTL Identification Associated With Yellow Mosaic Disease Resistance in Bitter Gourd (Momordica charantia L.)
Source: Front Plant Sci. 2021 Jun 24;12:671620. doi: 10.3389/fpls.2021.671620 (PMC8264296; doi:10.3389/fpls.2021.671620)
Supplement: Supplementary file 3 [file Table_2.xlsx]

## Sheet: Markers detail
SNP_physical Position	Linkage group	Position in cM
C1_378910	C1	0
C1_1728229	C1	0.588179
C1_1667552	C1	1.19053
C1_1315383	C1	1.83148
C1_191379	C1	9.022
C1_8748884	C1	14.9805
C1_6946981	C1	14.9805
C1_6335913	C1	17.7998
C1_8668459	C1	18.395
C1_8148772	C1	20.2474
C1_8148681	C1	20.2474
C1_9623935	C1	20.8883
C1_9606578	C1	22.1079
C1_9612045	C1	22.1079
C1_9623959	C1	22.1079
C1_9594675	C1	22.1079
C1_9608414	C1	22.1079
C1_10513781	C1	22.8324
C1_9816591	C1	23.4276
C1_9816959	C1	23.4276
C1_9816453	C1	23.4276
C1_9811927	C1	23.4276
C1_9492666	C1	24.03
C1_8638941	C1	26.9311
C1_8639093	C1	26.9311
C1_8653675	C1	26.9311
C1_8653687	C1	26.9311
C1_8655727	C1	26.9311
C1_8655778	C1	26.9311
C1_8655823	C1	26.9311
C1_8657582	C1	26.9311
C1_8652290	C1	26.9311
C1_8647088	C1	27.5977
C1_6939124	C1	28.4904
C1_6833128	C1	28.4904
C1_1852997	C1	29.3993
C1_1737970	C1	29.3993
C1_1767196	C1	29.3993
C1_1767197	C1	29.3993
C1_1860883	C1	29.3993
C1_1812737	C1	29.3993
C1_1758385	C1	29.3993
C1_1864770	C1	29.3993
C1_1864844	C1	29.3993
C1_1870287	C1	29.3993
C1_1848147	C1	29.3993
C1_1852967	C1	29.3993
C1_6933881	C1	29.3993
C1_1869815	C1	29.3993
C1_6798977	C1	29.3993
C1_6798945	C1	29.3993
C1_1747384	C1	29.3993
C1_6937820	C1	29.3993
C1_6937735	C1	29.3993
C1_6937806	C1	29.3993
C1_1798566	C1	29.3993
C1_3398524	C1	29.3993
C1_6820928	C1	29.3993
C1_6810502	C1	29.3993
C1_6852578	C1	29.3993
C1_6948345	C1	29.3993
C1_6954222	C1	29.3993
C1_6866286	C1	29.3993
C1_6844954	C1	29.3993
C1_6841211	C1	29.3993
C1_6841270	C1	29.3993
C1_6191813	C1	29.3993
C1_6869718	C1	29.3993
C1_6869715	C1	29.3993
C1_6830148	C1	29.3993
C1_6830121	C1	29.3993
C1_6830022	C1	29.3993
C1_6822447	C1	29.3993
C1_6820944	C1	29.3993
C1_1873412	C1	29.3993
C1_6776637	C1	29.3993
C1_6795511	C1	29.3993
C1_6787123	C1	29.3993
C1_6787017	C1	29.3993
C1_6787009	C1	29.3993
C1_6779225	C1	29.3993
C1_6779680	C1	29.3993
C1_6827350	C1	29.3993
C1_1803365	C1	29.3993
C1_1770854	C1	29.3993
C1_1864011	C1	29.3993
C1_1723407	C1	29.3993
C1_1874514	C1	29.3993
C1_1846628	C1	29.3993
C1_1807979	C1	29.3993
C1_1807877	C1	29.3993
C1_8018837	C1	29.3993
C1_8018826	C1	29.3993
C1_1807888	C1	29.3993
C1_8024697	C1	29.3993
C1_8357690	C1	30.0402
C1_7885616	C1	30.6426
C1_8349191	C1	30.6426
C1_7885633	C1	30.6426
C1_6869688	C1	31.2523
C1_1873912	C1	31.2523
C1_1709457	C1	31.2523
C1_1730231	C1	31.2523
C1_6774382	C1	31.2523
C1_1854168	C1	31.2523
C1_6775807	C1	31.2523
C1_6775995	C1	31.2523
C1_6775906	C1	31.2523
C1_6774476	C1	31.2523
C1_6798569	C1	31.2523
C1_6798599	C1	31.2523
C1_6798747	C1	31.2523
C1_1863591	C1	31.2523
C1_6921366	C1	31.2523
C1_6923921	C1	31.2523
C1_8349901	C1	31.2523
C1_8361435	C1	31.2523
C1_8795327	C1	31.8404
C1_9571106	C1	33.017
C1_9579496	C1	33.017
C1_9636941	C1	33.5787
C1_9647060	C1	33.5787
C1_9637042	C1	33.5787
C1_9656966	C1	33.5787
C1_9658989	C1	33.5787
C1_9659218	C1	33.5787
C1_9663424	C1	33.5787
C1_9663799	C1	33.5787
C1_9637189	C1	33.5787
C1_9673629	C1	33.5787
C1_9650795	C1	33.5787
C1_9674493	C1	33.5787
C1_9637419	C1	33.5787
C1_9633445	C1	33.5787
C1_9650322	C1	33.5787
C1_9650321	C1	33.5787
C1_10724802	C1	37.155
C1_10725240	C1	37.155
C1_10500996	C1	40.4487
C1_10531247	C1	42.9501
C1_10531323	C1	42.9501
C1_10531389	C1	42.9501
C1_10536545	C1	42.9501
C1_9921845	C1	51.7682
C1_21224128	C1	82.2031
C1_20553837	C1	92.8857
C1_19760515	C1	99.167
C1_19821837	C1	101.733
C1_19824593	C1	101.733
C1_19821833	C1	101.733
C1_19085246	C1	111.068
C1_19616798	C1	116.725
C1_18926729	C1	122.303
C1_18965533	C1	124.178
C1_19364383	C1	129.258
C1_19364527	C1	129.258
C1_19333640	C1	129.846
C1_19333642	C1	129.846
C1_19335713	C1	131.93
C1_20010703	C1	138.416
C1_20600080	C1	145.821
C1_20608166	C1	147.629
C1_20614402	C1	147.629
C1_20526662	C1	147.629
C1_20526715	C1	147.629
C1_20526856	C1	147.629
C1_20606572	C1	147.629
C1_20620843	C1	147.629
C1_20735800	C1	147.629
C1_20627254	C1	147.629
C1_20934512	C1	148.911
C1_20862033	C1	148.911
C1_20725887	C1	149.492
C1_20612491	C1	150.197
C1_20936391	C1	153.934
C1_20934723	C1	154.567
C1_20896980	C1	154.567
C1_21113232	C1	155.849
C1_21227679	C1	157.148
C1_21444228	C1	158.447
C1_21451236	C1	159.049
C1_21456252	C1	159.049
C1_21834481	C1	167.207
C1_21834534	C1	173.489
C1_21790655	C1	178.77
C1_22364717	C1	185.233
C1_22358385	C1	189.209
C1_22358552	C1	189.209
C1_22398345	C1	193.003
C1_22298745	C1	204.214
C1_22298805	C1	204.214
C1_22298756	C1	204.214
C1_22426551	C1	216.777
C1_21496598	C1	221.162
C1_21499550	C1	228.26
C2_7578348	C2	0
C2_8124825	C2	3.62876
C2_8519734	C2	5.71289
C2_8510111	C2	8.92188
C2_8494834	C2	8.92188
C2_8999849	C2	9.71539
C2_8999709	C2	9.71539
C2_8999752	C2	9.71539
C2_9003170	C2	10.3326
C2_8496996	C2	10.3326
C2_9001003	C2	10.3326
C2_8995154	C2	10.3326
C2_8997415	C2	10.3326
C2_8997414	C2	10.3326
C2_8994072	C2	10.3326
C2_9003131	C2	10.3326
C2_9003061	C2	10.3326
C2_9003010	C2	10.3326
C2_9003182	C2	10.3326
C2_9000953	C2	10.3326
C2_9001029	C2	10.3326
C2_9001020	C2	10.3326
C2_8510333	C2	12.2813
C2_8507137	C2	12.2813
C2_8507107	C2	12.2813
C2_8474582	C2	12.2813
C2_9262405	C2	13.71
C2_9014525	C2	13.71
C2_9047273	C2	13.71
C2_9066756	C2	18.0955
C2_8914281	C2	19.315
C2_8914525	C2	19.315
C2_9121662	C2	24.0581
C2_9120821	C2	24.0581
C2_9121093	C2	24.0581
C2_9121136	C2	24.0581
C2_8904607	C2	25.9574
C2_8904958	C2	26.6716
C2_9072062	C2	26.6716
C2_8905018	C2	26.6716
C2_8927376	C2	26.6716
C2_8906836	C2	26.6716
C2_8677576	C2	28.7271
C2_8677390	C2	29.3153
C2_8679419	C2	29.3153
C3_973326	C3	0
C3_899995	C3	5.18937
C3_908534	C3	5.18937
C3_879997	C3	5.18937
C3_892166	C3	5.18937
C3_902920	C3	5.18937
C3_877691	C3	5.18937
C3_892123	C3	5.18937
C3_889313	C3	5.18937
C3_790687	C3	7.77709
C3_816411	C3	12.7928
C3_810868	C3	15.8081
C3_1118154	C3	27.0052
C3_675020	C3	31.7804
C3_1609269	C3	38.6396
C3_1625668	C3	38.6396
C3_1625464	C3	38.6396
C3_3405925	C3	43.9614
C3_2198457	C3	48.6615
C3_2198435	C3	48.6615
C3_2020285	C3	53.9833
C3_1563894	C3	58.9986
C3_1272868	C3	61.2384
C3_1563915	C3	64.2264
C3_1563969	C3	64.2264
C3_636728	C3	64.9615
C3_12889	C3	67.6664
C3_31861	C3	67.6664
C3_31711	C3	67.6664
C3_57789	C3	67.6664
C3_60470	C3	67.6664
C3_11256	C3	67.6664
C3_11460	C3	67.6664
C3_38677	C3	67.6664
C3_162063	C3	67.6664
C3_162077	C3	67.6664
C3_217421	C3	67.6664
C3_228755	C3	67.6664
C3_228842	C3	67.6664
C3_266194	C3	67.6664
C3_266207	C3	67.6664
C3_285320	C3	67.6664
C3_285397	C3	67.6664
C3_16417	C3	67.6664
C3_99099	C3	67.6664
C3_224794	C3	67.6664
C3_224787	C3	67.6664
C3_224817	C3	67.6664
C3_224869	C3	67.6664
C3_60630	C3	67.6664
C3_115856	C3	67.6664
C3_274667	C3	67.6664
C3_274719	C3	67.6664
C3_181669	C3	67.6664
C3_261732	C3	67.6664
C3_261808	C3	67.6664
C3_261810	C3	67.6664
C3_261994	C3	67.6664
C3_547058	C3	67.6664
C3_266458	C3	67.6664
C3_592438	C3	67.6664
C3_8147	C3	67.6664
C3_27612	C3	67.6664
C3_694176	C3	67.6664
C3_26144	C3	67.6664
C3_275883	C3	67.6664
C3_121032	C3	67.6664
C3_577347	C3	67.6664
C3_275783	C3	67.6664
C3_275798	C3	67.6664
C3_279851	C3	67.6664
C3_109284	C3	67.6664
C3_265597	C3	67.6664
C3_263628	C3	67.6664
C3_11497	C3	70.1267
C3_60448	C3	70.1267
C3_263697	C3	72.587
C3_128499	C3	72.587
C3_128726	C3	72.587
C3_362356	C3	72.587
C3_265959	C3	72.587
C3_941978	C3	73.806
C3_954220	C3	73.806
C3_954110	C3	73.806
C3_870010	C3	74.4816
C3_964331	C3	75.1572
C3_964192	C3	75.1572
C3_964326	C3	77.8259
C3_1640344	C3	82.6785
C3_1640286	C3	82.6785
C3_2932805	C3	88.1529
C3_2932936	C3	88.1529
C3_2932982	C3	88.1529
C3_2920823	C3	88.1529
C3_2923090	C3	88.1529
C3_2923286	C3	88.1529
C3_2930088	C3	88.1529
C3_2924894	C3	88.1529
C3_2924970	C3	88.1529
C3_2925041	C3	88.1529
C3_2925057	C3	88.1529
C3_2810557	C3	88.8991
C3_2877649	C3	89.6452
C3_2816430	C3	89.6452
C3_2945677	C3	91.0739
C3_4685782	C3	97.0713
C3_4696596	C3	97.0713
C3_4652130	C3	97.0713
C3_4652179	C3	97.0713
C3_4659672	C3	97.0713
C3_3703409	C3	100.975
C3_4662738	C3	103.608
C3_3431170	C3	107.46
C3_3391409	C3	110.129
C3_3431348	C3	116.592
C3_3431400	C3	116.592
C3_8948722	C3	127.675
C3_8948908	C3	127.675
C3_9024426	C3	127.675
C3_9324105	C3	128.316
C3_9324284	C3	128.316
C3_9611391	C3	128.316
C3_9611567	C3	128.316
C3_10274067	C3	128.316
C3_9659377	C3	128.316
C3_10310006	C3	128.316
C3_8939841	C3	133.984
C3_10866976	C3	139.173
C3_10866936	C3	139.173
C3_10704028	C3	139.173
C3_10704064	C3	139.173
C3_10710690	C3	139.173
C3_10900622	C3	139.173
C3_10794656	C3	139.173
C3_10907775	C3	139.173
C3_10637736	C3	139.173
C3_10640468	C3	139.806
C3_10638557	C3	139.806
C3_10645848	C3	139.806
C3_10639807	C3	139.806
C3_10661012	C3	139.806
C3_10661095	C3	139.806
C3_10666023	C3	139.806
C3_10666066	C3	139.806
C3_10712308	C3	139.806
C3_10712233	C3	139.806
C3_10712185	C3	139.806
C3_10712149	C3	139.806
C3_10949012	C3	139.806
C3_10948830	C3	139.806
C3_10882138	C3	139.806
C3_10703105	C3	139.806
C3_10703040	C3	139.806
C3_10703012	C3	139.806
C3_10954121	C3	139.806
C3_10951250	C3	139.806
C3_10953889	C3	139.806
C3_10905579	C3	139.806
C3_10892909	C3	139.806
C3_10832623	C3	139.806
C3_10741042	C3	139.806
C3_10741202	C3	139.806
C3_10741176	C3	139.806
C3_10884480	C3	139.806
C3_10837003	C3	139.806
C3_10836923	C3	139.806
C3_10836849	C3	139.806
C3_10836763	C3	139.806
C3_10836295	C3	139.806
C3_10715499	C3	139.806
C3_10715498	C3	139.806
C3_10715554	C3	139.806
C3_10715521	C3	139.806
C3_10715403	C3	139.806
C3_10832904	C3	139.806
C3_10711027	C3	139.806
C3_10711025	C3	139.806
C3_10743052	C3	139.806
C3_10698258	C3	139.806
C3_10794776	C3	139.806
C3_5963921	C3	140.732
C3_5861688	C3	141.407
C3_6301791	C3	142.048
C3_6335466	C3	142.048
C3_5781933	C3	142.048
C3_6464947	C3	142.048
C3_7925495	C3	142.794
C3_11471698	C3	142.794
C3_11480958	C3	142.794
C3_11476932	C3	142.794
C3_11490121	C3	142.794
C3_11490098	C3	142.794
C3_11493363	C3	142.794
C3_11493281	C3	142.794
C3_11493162	C3	142.794
C3_7769264	C3	142.794
C3_11482271	C3	142.794
C3_11507753	C3	142.794
C3_11507740	C3	142.794
C3_11518748	C3	142.794
C3_11506584	C3	142.794
C3_11485402	C3	142.794
C3_11512634	C3	142.794
C3_11481539	C3	142.794
C3_11479102	C3	142.794
C3_7801084	C3	142.794
C3_7975115	C3	142.794
C3_7413144	C3	142.794
C3_7122271	C3	142.794
C3_7314560	C3	142.794
C3_7808414	C3	142.794
C3_7924029	C3	142.794
C3_7718508	C3	142.794
C3_10538258	C3	142.794
C3_10547930	C3	142.794
C3_10538380	C3	142.794
C3_10550040	C3	142.794
C3_10550022	C3	142.794
C3_7533149	C3	143.356
C3_6490442	C3	143.912
C3_5810824	C3	143.912
C3_6600991	C3	143.912
C3_6291138	C3	143.912
C3_6304769	C3	143.912
C3_6249687	C3	143.912
C3_7014642	C3	143.912
C3_6222177	C3	143.912
C3_5810772	C3	143.912
C3_6809821	C3	143.912
C3_11081281	C3	144.932
C3_11081069	C3	144.932
C3_14788898	C3	149.488
C4_1191232	C4(a)	0
C4_243719	C4(a)	8.40978
C4_73418	C4(a)	9.04262
C4_172751	C4(a)	9.04262
C4_959928	C4(a)	10.9182
C4_1301165	C4(a)	10.9182
C4_1301172	C4(a)	10.9182
C4_1116349	C4(a)	10.9182
C4_949926	C4(a)	10.9182
C4_1124042	C4(a)	10.9182
C4_1114222	C4(a)	10.9182
C4_1305913	C4(a)	10.9182
C4_1297308	C4(a)	10.9182
C4_1953658	C4(a)	11.6873
C4_2230719	C4(a)	13.5743
C4_2628023	C4(a)	14.2409
C4_2999024	C4(a)	15.4755
C4_3037977	C4(a)	20.0327
C4_3037837	C4(a)	20.6074
C4_2224327	C4(a)	23.3875
C4_2227972	C4(a)	23.3875
C4_2216372	C4(a)	23.3875
C4_2227869	C4(a)	23.3875
C4_2237976	C4(a)	23.3875
C4_2214494	C4(a)	23.3875
C4_2987207	C4(a)	24.1566
C4_2987139	C4(a)	24.1566
C4_3686123	C4(a)	26.5772
C4_3305505	C4(a)	29.2459
C4_3305277	C4(a)	29.2459
C4_4299864	C4(a)	31.7793
C4_4391118	C4(a)	31.7793
C4_4502940	C4(a)	35.7871
C4_4499566	C4(a)	35.7871
C4_4752781	C4(a)	40.4146
C4_4741869	C4(a)	41.1187
C4_4760968	C4(a)	41.1187
C4_4754259	C4(a)	41.1187
C4_4668198	C4(a)	44.5016
C4_4706672	C4(a)	45.1594
C4_8291147	C4(b)	0
C4_8291139	C4(b)	0
C4_9003866	C4(b)	3.02325
C4_8852072	C4(b)	8.86216
C4_8852067	C4(b)	8.86216
C4_8684104	C4(b)	15.4198
C4_8684196	C4(b)	15.4198
C4_8684163	C4(b)	15.4198
C4_8683969	C4(b)	15.4198
C4_8907610	C4(b)	20.7416
C4_8907498	C4(b)	20.7416
C4_8994360	C4(b)	23.4464
C4_8986617	C4(b)	28.3911
C4_8986697	C4(b)	28.3911
C4_8986671	C4(b)	28.3911
C4_8986547	C4(b)	28.3911
C4_8986633	C4(b)	28.3911
C4_8981020	C4(b)	34.7195
C4_9128100	C4(b)	38.6951
C4_8925640	C4(b)	39.1082
C4_8855039	C4(b)	41.8131
C4_8913919	C4(b)	42.8232
C4_8913829	C4(b)	43.0719
C4_9007324	C4(b)	44.0821
C4_9007184	C4(b)	44.0821
C4_9007264	C4(b)	44.5771
C4_8884810	C4(b)	44.8233
C4_9009242	C4(b)	45.0696
C4_9112713	C4(b)	45.0696
C4_8810457	C4(b)	45.0696
C4_8619632	C4(b)	45.0696
C4_9112866	C4(b)	45.0696
C4_9112834	C4(b)	45.0696
C4_9112745	C4(b)	45.0696
C4_9058795	C4(b)	45.3159
C4_9023221	C4(b)	45.3159
C4_9023098	C4(b)	45.3159
C4_9022991	C4(b)	45.3159
C4_9030524	C4(b)	45.5646
C4_8742854	C4(b)	46.0597
C4_8971507	C4(b)	46.3084
C4_9025005	C4(b)	46.5571
C4_9009288	C4(b)	46.8034
C4_9009270	C4(b)	46.8034
C4_9009152	C4(b)	46.8034
C4_8999848	C4(b)	46.8034
C4_8999750	C4(b)	46.8034
C4_8999744	C4(b)	46.8034
C4_8999737	C4(b)	46.8034
C4_8999641	C4(b)	46.8034
C4_8976402	C4(b)	46.8034
C4_8976216	C4(b)	46.8034
C4_8949581	C4(b)	46.8034
C4_8887749	C4(b)	47.0497
C4_8943860	C4(b)	47.2984
C4_8976329	C4(b)	48.0522
C4_8849188	C4(b)	48.0522
C4_8849185	C4(b)	48.0522
C4_8849083	C4(b)	48.0522
C4_8635121	C4(b)	48.0522
C4_8635012	C4(b)	48.0522
C4_8855029	C4(b)	48.2985
C4_8855014	C4(b)	48.2985
C4_8854985	C4(b)	48.2985
C4_8849202	C4(b)	48.2985
C4_8847770	C4(b)	48.5447
C4_9003898	C4(b)	51.6092
C4_8981111	C4(b)	59.5237
C4_9019453	C4(b)	62.9634
C4_9019432	C4(b)	64.2792
C4_9019390	C4(b)	64.2792
C4_9019324	C4(b)	64.2792
C4_9036704	C4(b)	68.6751
C4_9036670	C4(b)	68.6751
C4_9036636	C4(b)	68.6751
C4_9036652	C4(b)	68.6751
C4_8913923	C4(b)	73.9382
C4_8848981	C4(b)	74.9586
C4_8848908	C4(b)	74.9586
C4_8836469	C4(b)	75.4586
C4_8836449	C4(b)	75.4586
C4_8836260	C4(b)	75.4586
C4_8836226	C4(b)	75.4586
C4_8836214	C4(b)	75.4586
C4_8829497	C4(b)	75.4586
C4_8829480	C4(b)	75.4586
C4_8829466	C4(b)	75.4586
C4_8829447	C4(b)	75.4586
C4_9030538	C4(b)	75.7048
C4_8964394	C4(b)	75.7048
C4_8964391	C4(b)	75.7048
C4_8964365	C4(b)	75.7048
C4_8964243	C4(b)	75.7048
C4_8964200	C4(b)	75.7048
C4_8741732	C4(b)	75.7048
C4_9063187	C4(b)	75.9536
C4_9063027	C4(b)	75.9536
C4_8972411	C4(b)	75.9536
C4_8694697	C4(b)	75.9536
C4_8694633	C4(b)	76.2023
C4_8969780	C4(b)	76.451
C4_8969702	C4(b)	76.451
C4_8971553	C4(b)	76.9461
C4_8844514	C4(b)	77.1923
C4_8975670	C4(b)	77.4411
C4_8975547	C4(b)	77.4411
C4_8975596	C4(b)	77.4411
C4_8964658	C4(b)	77.9461
C4_8964705	C4(b)	77.9461
C4_8619044	C4(b)	78.1973
C4_8618876	C4(b)	78.1973
C4_8992121	C4(b)	78.9436
C4_8992082	C4(b)	79.1899
C4_8635646	C4(b)	79.9361
C4_8635621	C4(b)	79.9361
C4_8980126	C4(b)	79.9361
C4_9064064	C4(b)	80.1824
C4_9064112	C4(b)	80.1824
C4_9064113	C4(b)	80.1824
C4_9064311	C4(b)	80.1824
C4_8683034	C4(b)	80.1824
C4_8683131	C4(b)	80.1824
C4_8683025	C4(b)	80.1824
C4_8683019	C4(b)	80.1824
C4_8683005	C4(b)	80.1824
C4_8683085	C4(b)	80.1824
C4_9064161	C4(b)	80.4311
C4_9064201	C4(b)	80.4311
C4_9064210	C4(b)	80.9261
C4_9064257	C4(b)	80.9261
C4_8964755	C4(b)	81.4261
C4_8964664	C4(b)	81.6748
C4_8964839	C4(b)	81.6748
C4_8619098	C4(b)	82.1748
C4_8619080	C4(b)	82.1748
C4_8618990	C4(b)	82.4235
C4_8810624	C4(b)	82.9235
C4_8883820	C4(b)	82.9235
C4_8883670	C4(b)	82.9235
C4_8884380	C4(b)	83.1747
C4_8884546	C4(b)	83.1747
C4_8931527	C4(b)	83.6698
C4_8810423	C4(b)	83.6698
C4_8972376	C4(b)	84.416
C4_8699297	C4(b)	84.6623
C4_8699258	C4(b)	84.6623
C4_9102086	C4(b)	85.6827
C4_9102248	C4(b)	85.6827
C4_8602839	C4(b)	86.9782
C4_8606031	C4(b)	88.0092
C4_8915048	C4(b)	89.0509
C4_8915261	C4(b)	89.0509
C4_8854123	C4(b)	90.3464
C4_8854126	C4(b)	90.3464
C4_8854183	C4(b)	90.3464
C4_8854193	C4(b)	90.3464
C4_9007277	C4(b)	90.8618
C4_8926351	C4(b)	91.1208
C4_8926400	C4(b)	91.1208
C4_9062862	C4(b)	92.9539
C4_9062594	C4(b)	93.2002
C4_9062659	C4(b)	93.2002
C4_9062703	C4(b)	93.4489
C4_9022616	C4(b)	94.9798
C4_9022661	C4(b)	94.9798
C4_9021033	C4(b)	95.7336
C4_9032052	C4(b)	96.7437
C4_9032173	C4(b)	96.7437
C4_9032092	C4(b)	96.99
C4_9032260	C4(b)	96.99
C4_8928589	C4(b)	98.5367
C4_8928612	C4(b)	98.788
C4_8870689	C4(b)	99.5816
C4_9007271	C4(b)	100.119
C4_8810540	C4(b)	101.972
C4_8810562	C4(b)	101.972
C4_8810605	C4(b)	101.972
C4_8985192	C4(b)	104.38
C4_8985214	C4(b)	104.38
C4_8985164	C4(b)	104.38
C4_9003299	C4(b)	105.792
C4_9003398	C4(b)	105.792
C4_9003408	C4(b)	105.792
C4_9003387	C4(b)	105.792
C4_9101246	C4(b)	108.636
C4_9101291	C4(b)	108.636
C4_9101296	C4(b)	108.636
C4_9101377	C4(b)	108.636
C4_9101382	C4(b)	108.636
C4_9101327	C4(b)	108.887
C4_9101332	C4(b)	108.887
C4_8964699	C4(b)	111.295
C4_8964696	C4(b)	111.549
C4_8593596	C4(b)	112.613
C4_8593606	C4(b)	112.613
C4_8593694	C4(b)	112.613
C4_9025314	C4(b)	114.226
C4_9025750	C4(b)	115.279
C4_9025758	C4(b)	115.279
C4_9025786	C4(b)	115.279
C4_9025902	C4(b)	115.279
C4_9025930	C4(b)	115.279
C4_9025772	C4(b)	115.279
C4_8852406	C4(b)	117.882
C4_8602457	C4(b)	118.164
C4_8851980	C4(b)	122.313
C4_8983340	C4(b)	126.935
C4_8983463	C4(b)	126.935
C4_8686337	C4(b)	131.193
C4_8686445	C4(b)	131.193
C4_8686454	C4(b)	131.193
C4_8686499	C4(b)	131.193
C4_8850758	C4(b)	134.176
C4_9003009	C4(b)	136.465
C4_9003022	C4(b)	136.465
C4_9003040	C4(b)	136.465
C4_9081125	C4(b)	137.962
C4_8885969	C4(b)	138.8
C4_8887073	C4(b)	141.074
C4_8887065	C4(b)	141.074
C4_8886976	C4(b)	141.074
C4_8886971	C4(b)	141.074
C4_8944805	C4(b)	144.453
C4_8557760	C4(b)	148.306
C4_8557933	C4(b)	148.306
C4_8557931	C4(b)	148.306
C4_8590432	C4(b)	150.182
C4_8590304	C4(b)	150.182
C4_8508955	C4(b)	151.594
C4_8509077	C4(b)	151.868
C4_8509043	C4(b)	152.144
C4_8500693	C4(b)	154.292
C4_8500820	C4(b)	154.292
C4_8500664	C4(b)	154.292
C4_8548129	C4(b)	155.542
C4_8548128	C4(b)	155.542
C4_8548025	C4(b)	155.542
C4_8507198	C4(b)	155.882
C5_10292095	C5	0
C5_10821250	C5	0.833171
C5_10807692	C5	1.68046
C5_10807056	C5	2.91508
C5_10736574	C5	8.00395
C5_10259310	C5	8.00395
C5_10259456	C5	8.00395
C5_10735317	C5	8.00395
C5_10270343	C5	8.00395
C5_10270180	C5	8.00395
C5_10270276	C5	8.00395
C5_10263404	C5	8.00395
C5_10844178	C5	8.59913
C5_10844238	C5	12.9302
C5_10839453	C5	13.5184
C5_10839425	C5	13.5184
C5_10730787	C5	13.5184
C5_10730685	C5	13.5184
C5_10730684	C5	13.5184
C5_10730760	C5	13.5184
C5_10678236	C5	13.5184
C5_10678144	C5	13.5184
C5_10298244	C5	13.5184
C5_10736577	C5	13.5184
C5_10695690	C5	13.5184
C5_10724395	C5	13.5184
C5_10295185	C5	13.5184
C5_10294009	C5	13.5184
C5_10841405	C5	13.5184
C5_9825649	C5	18.5337
C5_12741217	C5	22.8291
C5_15133915	C5	25.4284
C5_11334889	C5	32.9832
C5_15577558	C5	34.3346
C5_15593429	C5	34.3346
C5_15560841	C5	34.3346
C5_15593928	C5	34.3346
C5_15528732	C5	34.3346
C5_15545980	C5	34.3346
C5_15589574	C5	34.3346
C5_15593907	C5	34.3346
C5_15546694	C5	34.3346
C5_15546717	C5	34.3346
C5_15552218	C5	34.3346
C5_15542003	C5	34.3346
C5_14647674	C5	37.6283
C5_13306176	C5	37.6283
C5_14487473	C5	37.6283
C5_12839850	C5	37.6283
C5_13902010	C5	40.1617
C5_13902034	C5	40.1617
C5_14530468	C5	41.8285
C5_10043324	C5	44.1022
C5_10039007	C5	45.2386
C5_10033419	C5	45.2386
C5_10031321	C5	45.2386
C5_10033420	C5	45.2386
C5_10044013	C5	45.2386
C5_15667066	C5	55.3709
C5_15610729	C5	55.3709
C5_15816737	C5	55.3709
C5_16119436	C5	55.3709
C5_10004916	C5	55.3709
C5_9956309	C5	56.0287
C5_9934037	C5	56.8222
C5_9965868	C5	57.5797
C5_9965706	C5	57.5797
C5_9956715	C5	57.5797
C5_9954580	C5	57.5797
C5_9957301	C5	57.5797
C5_9942998	C5	58.1679
C5_9942916	C5	58.1679
C5_9942890	C5	58.1679
C5_9942886	C5	58.1679
C5_9955834	C5	58.7561
C5_9956276	C5	58.7561
C5_9956250	C5	58.7561
C5_10008009	C5	60.9959
C5_10004860	C5	60.9959
C5_10351370	C5	60.9959
C5_16323815	C5	61.6537
C5_15858521	C5	61.6537
C5_15774488	C5	61.6537
C5_15774515	C5	61.6537
C5_15774760	C5	61.6537
C5_15645723	C5	61.6537
C5_15645718	C5	61.6537
C5_16017353	C5	61.6537
C5_15633390	C5	61.6537
C5_16067663	C5	61.6537
C5_16284690	C5	61.6537
C5_15606726	C5	61.6537
C5_11102931	C5	61.6537
C5_15786619	C5	61.6537
C5_15612336	C5	61.6537
C5_15612258	C5	61.6537
C5_16087391	C5	61.6537
C5_15645567	C5	61.6537
C5_15831952	C5	61.6537
C5_15642276	C5	61.6537
C5_16141055	C5	61.6537
C5_15709373	C5	61.6537
C5_15685608	C5	61.6537
C5_15683053	C5	61.6537
C5_15678316	C5	61.6537
C5_15783398	C5	61.6537
C5_15783589	C5	61.6537
C5_16144684	C5	61.6537
C5_15649215	C5	61.6537
C5_16178706	C5	61.6537
C5_15759738	C5	61.6537
C5_18350254	C5	62.5307
C5_18350349	C5	62.5307
C5_18075215	C5	62.5307
C5_18354698	C5	62.5307
C5_18362584	C5	65.96
C5_18360644	C5	65.96
C5_18360832	C5	65.96
C5_18360794	C5	65.96
C5_18362599	C5	65.96
C5_18363134	C5	65.96
C5_18725845	C5	71.2018
C5_19866281	C5	82.399
C5_19866343	C5	82.399
C5_19869475	C5	82.399
C5_19866514	C5	82.399
C5_19868102	C5	87.4147
C5_19282124	C5	93.4121
C5_19458691	C5	94.0699
C5_18354496	C5	96.1834
C5_18386598	C5	96.8412
C5_18441470	C5	96.8412
C5_16166935	C5	98.1571
C5_16010171	C5	98.1571
C5_16322149	C5	98.1571
C5_15805642	C5	98.1571
C5_15861590	C5	98.1571
C5_15766093	C5	98.1571
C5_15616137	C5	98.1571
C5_15616059	C5	98.1571
C5_15616207	C5	98.1571
C5_15722143	C5	98.1571
C5_15659416	C5	98.1571
C5_15659307	C5	98.1571
C5_15653986	C5	98.1571
C5_15653895	C5	98.1571
C5_15635834	C5	98.1571
C5_15860249	C5	98.1571
C5_15860305	C5	98.1571
C5_15860403	C5	98.1571
C5_15997244	C5	98.1571
C5_16033741	C5	98.1571
C5_16313728	C5	98.1571
C5_16210162	C5	98.1571
C5_16066112	C5	98.1571
C5_16104753	C5	98.1571
C5_16019264	C5	98.1571
C5_16019251	C5	98.1571
C5_16249637	C5	98.1571
C5_16265500	C5	98.1571
C5_16265555	C5	98.1571
C5_16265699	C5	98.1571
C5_16033899	C5	98.1571
C5_15702658	C5	98.1571
C5_16107039	C5	98.1571
C5_16141201	C5	98.1571
C5_16141260	C5	98.1571
C5_16199175	C5	98.1571
C5_16218026	C5	98.1571
C5_16218041	C5	98.1571
C5_16315126	C5	98.1571
C5_16152367	C5	98.1571
C5_16107647	C5	98.1571
C5_16006952	C5	98.1571
C5_15621818	C5	98.1571
C5_16157558	C5	98.1571
C5_15637405	C5	98.1571
C5_15702316	C5	98.1571
C5_15837014	C5	98.1571
C5_15961438	C5	98.1571
C5_15967728	C5	98.1571
C5_16082496	C5	98.1571
C5_16151970	C5	98.1571
C5_16210064	C5	98.1571
C5_16221311	C5	98.1571
C5_15767779	C5	98.1571
C5_16190253	C5	98.1571
C5_16190372	C5	98.1571
C5_16167872	C5	98.1571
C5_15742485	C5	98.1571
C5_16188027	C5	98.1571
C5_15875169	C5	98.1571
C5_15872512	C5	98.1571
C5_15872552	C5	98.1571
C5_15872565	C5	98.1571
C5_16220973	C5	98.1571
C5_15737148	C5	98.1571
C5_15737114	C5	98.1571
C5_16118980	C5	98.1571
C5_16119106	C5	98.1571
C5_16119047	C5	98.1571
C5_16118933	C5	98.1571
C5_15665030	C5	98.1571
C5_15664972	C5	98.1571
C5_15662886	C5	98.1571
C5_15881609	C5	98.1571
C5_16323287	C5	98.1571
C5_15722169	C5	98.1571
C5_15816736	C5	98.1571
C5_16236722	C5	98.1571
C5_15617946	C5	98.1571
C5_15716330	C5	98.1571
C5_16076743	C5	98.1571
C5_15650267	C5	98.1571
C5_15666917	C5	99.019
C5_16308333	C5	99.019
C5_11032561	C5	101.226
C5_8953972	C5	105.079
C5_8387047	C5	122.096
C5_8475289	C5	132.393
C5_8663942	C5	135.097
C5_8710712	C5	135.722
C5_8709345	C5	135.722
C5_8650902	C5	135.722
C5_8699304	C5	135.722
C5_8637175	C5	135.722
C5_8637024	C5	135.722
C5_8639941	C5	135.722
C5_8719013	C5	135.722
C5_8709591	C5	135.722
C5_8639893	C5	135.722
C5_8710767	C5	135.722
C5_8664014	C5	136.347
C5_8663849	C5	136.347
C5_8664027	C5	136.347
C5_8669569	C5	136.347
C5_8669673	C5	136.347
C5_8676554	C5	136.347
C5_8676835	C5	136.347
C5_8663879	C5	136.347
C5_8791441	C5	136.347
C5_8662528	C5	136.347
C5_8662575	C5	136.347
C5_8663821	C5	136.347
C5_9196526	C5	137.756
C5_9197149	C5	138.47
C5_9197232	C5	139.752
C5_9191719	C5	139.752
C5_9191258	C5	139.752
C5_9191137	C5	139.752
C5_9312191	C5	139.752
C5_9408065	C5	139.752
C5_9384629	C5	139.752
C5_9614019	C5	140.369
C5_8924070	C5	140.369
C5_9433288	C5	141.002
C5_9310300	C5	141.002
C5_9343864	C5	141.002
C5_9186639	C5	141.002
C5_9196331	C5	141.002
C5_9177931	C5	141.002
C5_9177886	C5	141.002
C5_9131283	C5	141.002
C5_9321041	C5	141.002
C5_9318221	C5	141.002
C5_9177673	C5	141.002
C5_9163815	C5	141.002
C5_9004242	C5	142.431
C5_8996858	C5	142.431
C5_8735936	C5	143.747
C5_8409196	C5	147.176
C5_8409575	C5	149.125
C5_8409124	C5	149.125
C5_8409126	C5	149.125
C5_7937924	C5	151.658
C5_8770358	C5	157.315
C5_8755679	C5	157.315
C5_8755551	C5	157.315
C5_8753068	C5	157.315
C5_8761239	C5	157.903
C5_8761327	C5	157.903
C5_8770011	C5	159.374
C6_641275	C6	0
C6_143842	C6	5.65666
C6_349576	C6	15.455
C6_25155	C6	15.455
C6_61858	C6	17.2734
C6_541485	C6	18.0086
C6_540031	C6	18.0086
C6_540137	C6	18.0086
C6_499222	C6	18.0086
C6_540237	C6	18.0086
C6_499371	C6	18.0086
C6_450593	C6	18.0086
C6_1186674	C6	19.9829
C6_941572	C6	20.6971
C6_950002	C6	21.4113
C6_951009	C6	25.04
C6_952656	C6	28.6168
C6_929946	C6	29.212
C6_991750	C6	29.8292
C6_972768	C6	29.8292
C6_945242	C6	29.8292
C6_949312	C6	29.8292
C6_951708	C6	29.8292
C6_1386040	C6	30.6911
C6_1386160	C6	30.6911
C6_1478457	C6	35.3705
C6_2374545	C6	45.5028
C6_1800126	C6	47.1979
C6_2294672	C6	51.1259
C6_2286131	C6	51.1259
C6_2283764	C6	51.1259
C6_2283950	C6	51.1259
C6_2101938	C6	51.7356
C6_2279770	C6	51.7356
C6_2279984	C6	51.7356
C6_2279874	C6	51.7356
C6_2105869	C6	51.7356
C6_2103444	C6	51.7356
C6_2225620	C6	51.7356
C6_1834343	C6	51.7356
C6_1848370	C6	51.7356
C6_1837742	C6	51.7356
C6_1850229	C6	51.7356
C6_1741315	C6	53.1442
C6_2101815	C6	54.4263
C6_2635508	C6	58.3296
C6_2638373	C6	58.3296
C6_2617407	C6	58.3296
C6_2627650	C6	59.779
C6_2481451	C6	62.0878
C6_2481547	C6	62.0878
C6_2481515	C6	62.0878
C6_2471879	C6	62.0878
C6_2476911	C6	62.0878
C6_2474311	C6	62.0878
C6_2475088	C6	62.0878
C6_2561401	C6	63.4036
C6_2541856	C6	64.0529
C6_2611037	C6	68.6803
C6_2611101	C6	69.3296
C6_2614075	C6	70.0337
C6_2611145	C6	70.7379
C6_2611028	C6	70.7379
C6_3246502	C6	88.0554
C6_3396086	C6	92.6118
C6_3517058	C6	96.4061
C6_3519121	C6	98.2585
C6_3516913	C6	100.111
C6_3516985	C6	100.111
C6_3837369	C6	113.715
C6_3837417	C6	113.715
C6_3837454	C6	113.715
C6_3837510	C6	113.715
C6_3837521	C6	113.715
C6_3837548	C6	113.715
C6_3855621	C6	114.27
C6_3855641	C6	114.27
C6_3855709	C6	114.27
C6_3850975	C6	114.27
C6_3851160	C6	114.27
C7_3669661	C7(a)	0
C7_3677921	C7(a)	0
C7_7044274	C7(a)	7.5171
C7_12907689	C7(a)	10.7261
C7_12909386	C7(a)	10.7261
C7_13320594	C7(a)	13.0804
C7_13361400	C7(a)	15.3544
C7_13363241	C7(a)	15.3544
C7_13874201	C7(a)	19.0643
C7_11288877	C7(a)	25.1265
C7_11229274	C7(a)	25.1265
C7_13086675	C7(a)	32.4342
C7_8383238	C7(a)	33.0155
C7_8287689	C7(a)	33.0155
C7_5521374	C7(a)	33.0155
C7_8228118	C7(a)	33.0155
C7_8229530	C7(a)	33.0155
C7_8229522	C7(a)	33.0155
C7_8306425	C7(a)	33.0155
C7_8266191	C7(a)	33.0155
C7_8489944	C7(a)	33.0155
C7_8235026	C7(a)	33.0155
C7_8270272	C7(a)	33.0155
C7_8384196	C7(a)	33.0155
C7_8313075	C7(a)	33.0155
C7_8369955	C7(a)	33.0155
C7_8346621	C7(a)	33.0155
C7_8322682	C7(a)	33.0155
C7_8247382	C7(a)	33.0155
C7_8295265	C7(a)	33.0155
C7_8283275	C7(a)	33.0155
C7_8512409	C7(a)	33.0155
C7_8512381	C7(a)	33.0155
C7_8512302	C7(a)	33.0155
C7_8512344	C7(a)	33.0155
C7_8236183	C7(a)	33.0155
C7_8246341	C7(a)	33.0155
C7_8415873	C7(a)	33.0155
C7_8396089	C7(a)	33.0155
C7_8399082	C7(a)	33.0155
C7_8388136	C7(a)	33.0155
C7_8345001	C7(a)	33.0155
C7_8344480	C7(a)	33.0155
C7_8276809	C7(a)	33.0155
C7_8269762	C7(a)	33.0155
C7_10958653	C7(a)	36.298
C7_10616634	C7(a)	36.298
C7_10616677	C7(a)	36.298
C7_10616732	C7(a)	36.298
C7_4679118	C7(a)	38.6429
C7_4683930	C7(a)	38.6429
C7_4684188	C7(a)	38.6429
C7_4684111	C7(a)	39.8478
C7_4679041	C7(a)	39.8478
C7_13491262	C7(b)	0
C7_6248073	C7(b)	10.2854
C7_6127745	C7(b)	10.2854
C7_6127792	C7(b)	10.2854
C7_6236335	C7(b)	10.2854
C7_6195269	C7(b)	10.2854
C7_6195053	C7(b)	10.2854
C7_6132427	C7(b)	10.2854
C7_6145315	C7(b)	10.2854
C7_6189912	C7(b)	10.2854
C7_6236408	C7(b)	10.2854
C7_6132677	C7(b)	10.2854
C7_6145354	C7(b)	10.2854
C7_6145324	C7(b)	10.2854
C7_4779516	C7(b)	11.1186
C7_6957874	C7(b)	12.255
C7_6112450	C7(b)	14.8209
C7_6245681	C7(b)	15.4965
C7_6188931	C7(b)	15.4965
C7_6127704	C7(b)	15.4965
C7_6212095	C7(b)	15.4965
C7_6244218	C7(b)	15.4965
C7_6132641	C7(b)	15.4965
C7_6197315	C7(b)	15.4965
C7_6401957	C7(b)	17.9371
C7_6297926	C7(b)	17.9371
C7_6344799	C7(b)	17.9371
C7_6344908	C7(b)	17.9371
C7_6357526	C7(b)	17.9371
C7_6361579	C7(b)	17.9371
C7_6373009	C7(b)	17.9371
C7_6375659	C7(b)	17.9371
C7_6365894	C7(b)	17.9371
C7_6271793	C7(b)	17.9371
C7_6263599	C7(b)	17.9371
C7_4391653	C7(b)	20.1769
C7_4371689	C7(b)	20.1769
C7_4426697	C7(b)	20.1769
C7_4412990	C7(b)	20.1769
C7_4370431	C7(b)	20.1769
C7_4370347	C7(b)	20.1769
C7_4374988	C7(b)	20.1769
C7_4375904	C7(b)	20.1769
C7_5878810	C7(b)	22.7646
C7_5736666	C7(b)	22.7646
C7_6232778	C7(b)	23.9695
C7_6201701	C7(b)	23.9695
C7_6201640	C7(b)	23.9695
C7_6152658	C7(b)	23.9695
C7_6149795	C7(b)	23.9695
C7_6147067	C7(b)	23.9695
C7_6244397	C7(b)	23.9695
C7_6197523	C7(b)	23.9695
C7_6197389	C7(b)	23.9695
C7_6197261	C7(b)	23.9695
C7_6251966	C7(b)	23.9695
C7_6188782	C7(b)	23.9695
C7_6211107	C7(b)	23.9695
C7_6247883	C7(b)	23.9695
C7_6232701	C7(b)	23.9695
C7_6232720	C7(b)	23.9695
C7_6126585	C7(b)	23.9695
C7_6184782	C7(b)	23.9695
C7_5756999	C7(b)	23.9695
C7_6555679	C7(b)	27.1989
C7_4458135	C7(b)	32.8555
C7_4914632	C7(b)	34.2255
C7_13836612	C7(b)	37.0851
C7_13838459	C7(b)	48.6479
C7_14521913	C7(b)	54.4419
C7_15050176	C7(b)	67.791
C7_15048991	C7(b)	72.9364
C7_15594177	C7(b)	78.4369
C7_15587459	C7(b)	86.6156
C7_15597622	C7(b)	87.31
C7_15601709	C7(b)	88.0141
C7_13583135	C7(b)	91.5905
C7_13587066	C7(b)	91.5905
C7_13586831	C7(b)	91.5905
C7_13583712	C7(b)	91.5905
C7_13579169	C7(b)	91.5905
C7_13551761	C7(b)	92.8726
C7_13576527	C7(b)	94.0775
C7_13582726	C7(b)	94.0775
C7_13582712	C7(b)	94.7184
C7_13621987	C7(b)	95.4032
C7_13594430	C7(b)	95.4032
C7_13594408	C7(b)	95.4032
C7_13637167	C7(b)	95.4032
C7_13637262	C7(b)	95.4032
C7_13651741	C7(b)	95.4032
C7_13651913	C7(b)	95.4032
C7_13653306	C7(b)	95.4032
C7_13653463	C7(b)	95.4032
C7_13659665	C7(b)	95.4032
C7_13661311	C7(b)	95.4032
C7_13661317	C7(b)	95.4032
C7_13625131	C7(b)	95.4032
C7_13660057	C7(b)	95.4032
C7_13660101	C7(b)	95.4032
C7_13598083	C7(b)	95.4032
C7_13598098	C7(b)	95.4032
C7_13604604	C7(b)	95.4032
C7_13604627	C7(b)	95.4032
C7_13621949	C7(b)	95.4032
C7_13651612	C7(b)	95.4032
C7_13651638	C7(b)	95.4032
C7_13651646	C7(b)	95.4032
C7_13651674	C7(b)	95.4032
C7_13651532	C7(b)	95.4032
C7_13618332	C7(b)	95.4032
C7_13618467	C7(b)	95.4032
C7_13616752	C7(b)	95.4032
C7_13599755	C7(b)	95.4032
C7_13655867	C7(b)	95.4032
C7_13655948	C7(b)	95.4032
C7_13655781	C7(b)	95.4032
C7_13634628	C7(b)	95.4032
C7_13656213	C7(b)	95.4032
C7_13616791	C7(b)	95.4032
C7_13594075	C7(b)	95.4032
C7_13594179	C7(b)	95.4032
C7_4820494	C7(b)	99.032
C7_14213333	C7(b)	103.094
C7_14246314	C7(b)	103.094
C7_15907575	C7(b)	105.914
C7_17127643	C7(b)	114.455
C7_17129941	C7(b)	114.455
C7_17129867	C7(b)	114.455
C7_17583801	C7(b)	122.724
C7_17721806	C7(b)	128.633
C7_17329998	C7(b)	134.722
C7_17256691	C7(b)	136.67
C7_17129865	C7(b)	136.67
C7_16438184	C7(b)	149.898
C7_16438235	C7(b)	149.898
C7_16439090	C7(b)	149.898
C7_16439081	C7(b)	149.898
C7_16439135	C7(b)	149.898
C7_16439102	C7(b)	149.898
C7_16679404	C7(b)	161.835
C7_16679251	C7(b)	161.835
C7_16043977	C7(c)	0
C7_16043997	C7(c)	0
C7_16048049	C7(c)	0.649275
C7_15547410	C7(c)	11.3841
C7_15547397	C7(c)	11.3841
C7_15557604	C7(c)	11.3841
C7_15555215	C7(c)	11.3841
C7_15557836	C7(c)	11.3841
C7_15542541	C7(c)	11.3841
C7_15538869	C7(c)	11.3841
C7_16005820	C7(c)	14.2034
C7_16355922	C7(c)	17.8857
C7_16355921	C7(c)	17.8857
C7_16306880	C7(c)	17.8857
C7_16306874	C7(c)	17.8857
C7_16306853	C7(c)	17.8857
C7_16306852	C7(c)	17.8857
C7_16306801	C7(c)	17.8857
C7_16306781	C7(c)	17.8857
C7_16334889	C7(c)	17.8857
C7_16334822	C7(c)	17.8857
C7_16334734	C7(c)	17.8857
C7_16306579	C7(c)	17.8857
C7_16306466	C7(c)	17.8857
C7_16306430	C7(c)	17.8857
C7_16350425	C7(c)	17.8857
C7_16322641	C7(c)	17.8857
C7_16322647	C7(c)	17.8857
C7_16322660	C7(c)	17.8857
C7_16322669	C7(c)	17.8857
C7_16322719	C7(c)	17.8857
C7_16311221	C7(c)	17.8857
C7_16311157	C7(c)	17.8857
C7_16327345	C7(c)	17.8857
C7_16327373	C7(c)	17.8857
C7_16327284	C7(c)	17.8857
C7_16355806	C7(c)	17.8857
C7_16331527	C7(c)	17.8857
C7_16331654	C7(c)	17.8857
C7_16355203	C7(c)	17.8857
C7_16333358	C7(c)	17.8857
C7_16333374	C7(c)	17.8857
C7_16331769	C7(c)	17.8857
C7_16308662	C7(c)	17.8857
C7_16308782	C7(c)	17.8857
C7_16149970	C7(c)	20.1594
C7_16454925	C7(c)	28.0805
C7_16452903	C7(c)	28.0805
C8_10427890	C8	0
C8_10304044	C8	1.21957
C8_10294405	C8	1.21957
C8_10489802	C8	4.97602
C8_10489713	C8	4.97602
C8_10489689	C8	4.97602
C8_10940931	C8	12.1665
C8_10947611	C8	13.3431
C8_10947455	C8	13.3431
C8_10947651	C8	13.3431
C8_10951042	C8	13.3431
C8_10944074	C8	13.3431
C8_10942839	C8	13.9048
C8_11468480	C8	20.0995
C8_11468467	C8	20.0995
C8_11468473	C8	20.0995
C8_11468447	C8	20.0995
C8_11468425	C8	20.0995
C8_23668617	C8	23.2776
C8_23673263	C8	23.2776
C8_23695276	C8	23.2776
C8_23720795	C8	23.2776
C8_23687983	C8	23.2776
C8_23681770	C8	23.2776
C8_23717872	C8	23.8799
C8_23676706	C8	23.8799
C8_23693638	C8	23.8799
C8_23693493	C8	23.8799
C8_20323707	C8	25.1458
C8_23254309	C8	25.1458
C8_23404641	C8	25.1458
C8_23935706	C8	25.1458
C8_23395697	C8	25.7555
C8_23395973	C8	25.7555
C8_13754819	C8	25.7555
C8_23399546	C8	25.7555
C8_13821257	C8	26.3049
C8_12938335	C8	26.3049
C8_13885199	C8	26.3049
C8_13918673	C8	26.3049
C8_13867911	C8	26.3049
C8_13894683	C8	26.3049
C8_13894697	C8	26.3049
C8_13896675	C8	26.3049
C8_13896545	C8	26.3049
C8_13160815	C8	26.9715
C8_12716746	C8	26.9715
C8_13160811	C8	26.9715
C8_13162360	C8	26.9715
C8_16214475	C8	31.5989
C8_22764641	C8	32.1736
C8_22847560	C8	32.1736
C8_22804843	C8	32.1736
C8_22837231	C8	32.7417
C8_22809928	C8	33.3098
C8_17878751	C8	34.4727
C8_16491879	C8	34.4727
C8_13353041	C8	35.9433
C8_12955499	C8	38.0568
C8_13139544	C8	39.3227
C8_18470751	C8	39.3227
C8_18443016	C8	39.3227
C8_17561223	C8	39.3227
C8_13328807	C8	39.3227
C8_16415320	C8	39.3227
C8_16305762	C8	39.3227
C8_15847351	C8	39.3227
C8_17813257	C8	39.3227
C8_18772525	C8	39.3227
C8_18771468	C8	39.3227
C8_16997134	C8	39.3227
C8_16287586	C8	39.3227
C8_15491745	C8	40.4464
C8_15031904	C8	40.4464
C8_14910519	C8	40.4464
C8_15095340	C8	40.4464
C8_15085670	C8	40.4464
C8_22657632	C8	41.021
C8_22679483	C8	41.021
C8_11586888	C8	44.9244
C8_23557104	C8	52.6752
C8_23557204	C8	52.6752
C8_23557205	C8	52.6752
C8_23546891	C8	52.6752
C8_23553950	C8	52.6752
C8_23553997	C8	52.6752
C8_23553843	C8	52.6752
C8_23553940	C8	52.6752
C8_23553793	C8	52.6752
C8_23544921	C8	52.6752
C8_23548246	C8	52.6752
C8_23546810	C8	52.6752
C8_23550264	C8	52.6752
C8_23550241	C8	52.6752
C8_23550286	C8	52.6752
C8_23553242	C8	52.6752
C8_23550676	C8	53.3081
C8_23550743	C8	53.3081
C8_23528359	C8	53.949
C8_23553846	C8	53.949
C8_23527142	C8	53.949
C8_23527108	C8	53.949
C8_23527200	C8	53.949
C8_23546818	C8	53.949
C8_23544952	C8	53.949
C8_23535968	C8	53.949
C8_23546842	C8	53.949
C8_24828030	C8	60.3451
C8_24828036	C8	60.3451
C8_24854214	C8	60.3451
C8_24854864	C8	60.3451
C8_24854913	C8	60.3451
C8_24851031	C8	60.3451
C8_24850982	C8	60.3451
C8_24774290	C8	60.3451
C8_24761688	C8	60.3451
C8_24715628	C8	62.4293
C8_25018740	C8	63.8182
C8_25007449	C8	63.8182
C8_25018920	C8	63.8182
C8_25290794	C8	67.9937
C8_25319532	C8	72.2399
C8_23034689	C8	82.9748
C8_23034494	C8	82.9748
C8_23254241	C8	83.6889
C8_23377894	C8	84.5816
C8_23377722	C8	84.5816
C8_20273717	C8	90.9965
C8_20258491	C8	91.8735
C8_20222740	C8	91.8735
C8_20181674	C8	91.8735
C8_21080268	C8	100.282
C8_21710013	C8	100.282
C8_20926758	C8	100.282
C8_21320068	C8	100.282
C8_13937481	C8	100.94
C8_13941805	C8	100.94
C8_13980910	C8	100.94
C8_14231485	C8	101.515
C8_14146091	C8	101.515
C8_14231470	C8	101.515
C8_20851361	C8	102.089
C8_21033017	C8	102.089
C8_20980583	C8	102.089
C8_21306648	C8	102.089
C8_21190957	C8	102.089
C8_21294009	C8	102.089
C8_21119148	C8	102.089
C8_21282455	C8	102.089
C8_20844382	C8	103.677
C8_20939017	C8	103.677
C8_20348510	C8	103.677
C8_21656109	C8	103.677
C8_20897275	C8	103.677
C8_17120578	C8	103.677
C8_21773148	C8	103.677
C8_19996483	C8	103.677
C8_14134087	C8	103.677
C8_14134212	C8	103.677
C8_18670266	C8	103.677
C8_17072077	C8	103.677
C8_14049773	C8	103.677
C8_14131829	C8	103.677
C8_14121806	C8	103.677
C8_14115456	C8	103.677
C8_14104682	C8	103.677
C8_14104532	C8	103.677
C8_14104482	C8	103.677
C8_14101679	C8	103.677
C8_14101678	C8	103.677
C8_14101645	C8	103.677
C8_14101555	C8	103.677
C8_14097100	C8	103.677
C8_14096901	C8	103.677
C8_14071763	C8	103.677
C8_14071758	C8	103.677
C8_14071679	C8	103.677
C8_14013929	C8	103.677
C8_14010475	C8	103.677
C8_14010393	C8	103.677
C8_14124545	C8	103.677
C8_14124447	C8	103.677
C8_14351737	C8	103.677
C8_14131893	C8	103.677
C8_14142397	C8	103.677
C8_14142564	C8	103.677
C8_14145088	C8	103.677
C8_14145100	C8	103.677
C8_14145166	C8	103.677
C8_14145221	C8	103.677
C8_14915230	C8	103.677
C8_16502429	C8	103.677
C8_18595407	C8	103.677
C8_16294782	C8	103.677
C8_13962890	C8	103.677
C8_13952411	C8	103.677
C8_13952236	C8	103.677
C8_13952220	C8	103.677
C8_13985125	C8	103.677
C8_13998935	C8	104.352
C8_13998982	C8	104.352
C8_13980864	C8	105.028
C8_13947239	C8	105.028
C8_15080542	C8	105.028
C8_13933371	C8	105.028
C8_13941817	C8	105.028
C8_14065854	C8	105.028
C8_14065794	C8	105.028
C8_18172620	C8	105.028
C8_14089969	C8	105.028
C8_14151245	C8	105.028
C8_14151347	C8	105.028
C8_14151150	C8	105.028
C8_14897285	C8	105.028
C8_14063198	C8	105.028
C8_14063024	C8	105.028
C8_12623201	C8	105.028
C8_14063200	C8	105.028
C8_14079973	C8	105.028
C8_14080005	C8	105.028
C8_14080054	C8	105.028
C8_14080116	C8	105.028
C8_14121706	C8	105.028
C8_14142304	C8	105.028
C8_14142320	C8	105.028
C8_14226603	C8	105.028
C8_15055901	C8	105.028
C8_15551842	C8	105.028
C8_19694965	C8	105.028
C8_14198495	C8	105.028
C8_15031648	C8	105.028
C8_15062460	C8	105.028
C8_15334378	C8	105.028
C8_19025303	C8	105.028
C8_18539061	C8	105.028
C8_14061608	C8	105.028
C8_18595473	C8	105.028
C8_14140793	C8	105.028
C8_14140893	C8	105.028
C8_14140929	C8	105.028
C8_14077804	C8	105.028
C8_14078004	C8	105.028
C8_16689665	C8	105.028
C8_15773409	C8	105.028
C8_15015438	C8	105.028
C8_16092513	C8	105.028
C8_19108528	C8	105.028
C8_17844588	C8	105.028
C8_15041800	C8	105.028
C8_15960519	C8	105.028
C8_14107079	C8	105.028
C8_14106985	C8	105.028
C8_15416515	C8	105.028
C8_14782665	C8	105.028
C8_15885563	C8	105.028
C8_14345582	C8	110.117
C8_19056082	C8	110.117
C8_19071563	C8	110.117
C8_19195701	C8	110.117
C9_7113088	C9	0
C9_7113077	C9	0
C9_6893726	C9	8.06784
C9_6893732	C9	8.06784
C9_6263077	C9	17.0661
C9_6166891	C9	18.8959
C9_6043967	C9	26.817
C9_6078727	C9	31.7617
C9_18257885	C9	35.2751
C9_18400262	C9	36.3617
C9_18257870	C9	36.3617
C9_13758860	C9	36.3617
C9_13758789	C9	36.3617
C9_19415126	C9	36.3617
C9_15246971	C9	36.3617
C9_15246826	C9	36.3617
C9_18312053	C9	36.3617
C9_12759953	C9	36.3617
C9_13412115	C9	36.3617
C9_15803095	C9	36.3617
C9_14350715	C9	36.3617
C9_13438686	C9	36.3617
C9_12747771	C9	36.3617
C9_19061606	C9	36.3617
C9_12806178	C9	36.3617
C9_17683341	C9	36.3617
C9_19517221	C9	36.3617
C9_15494290	C9	36.3617
C9_19339147	C9	36.3617
C9_13748438	C9	36.3617
C9_13403172	C9	36.3617
C9_13888487	C9	36.3617
C9_13481577	C9	36.3617
C9_13418887	C9	36.3617
C9_13418888	C9	36.3617
C9_13418847	C9	36.3617
C9_13418735	C9	36.3617
C9_13418698	C9	36.3617
C9_13577073	C9	36.3617
C9_13739003	C9	36.3617
C9_18262995	C9	36.3617
C9_20100250	C9	36.3617
C9_17389196	C9	36.3617
C9_17389143	C9	36.3617
C9_17389208	C9	36.3617
C9_17272602	C9	36.3617
C9_17519179	C9	36.3617
C9_17519277	C9	36.3617
C9_17279562	C9	36.3617
C9_14537470	C9	37.3048
C9_11328299	C9	38.9179
C9_11311490	C9	39.5276
C9_14454081	C9	40.0652
C9_14348602	C9	40.6465
C9_20840063	C9	41.2278
C9_21424145	C9	42.8949
C9_21442935	C9	42.8949
C9_21466090	C9	42.8949
C9_21428319	C9	42.8949
C9_21431956	C9	42.8949
C9_22445907	C9	42.8949
C9_21441490	C9	42.8949
C9_21431955	C9	42.8949
C9_21460932	C9	42.8949
C9_20702865	C9	43.4383
C9_20161243	C9	43.9939
C9_11478289	C9	43.9939
C9_17217200	C9	43.9939
C9_17429740	C9	43.9939
C9_17242605	C9	43.9939
C9_17242681	C9	43.9939
C9_17242663	C9	43.9939
C9_17524104	C9	43.9939
C9_17429788	C9	43.9939
C9_17429767	C9	43.9939
C9_17429703	C9	43.9939
C9_17430701	C9	43.9939
C9_17400070	C9	43.9939
C9_17400137	C9	43.9939
C9_17225295	C9	43.9939
C9_17333440	C9	43.9939
C9_17331092	C9	43.9939
C9_17331132	C9	43.9939
C9_17372033	C9	43.9939
C9_17324139	C9	43.9939
C9_17346913	C9	43.9939
C9_17178657	C9	43.9939
C9_17346965	C9	43.9939
C9_17405440	C9	43.9939
C9_17405496	C9	43.9939
C9_17225275	C9	43.9939
C9_17467971	C9	43.9939
C9_11344597	C9	43.9939
C9_11351396	C9	43.9939
C9_11407421	C9	43.9939
C9_11275716	C9	43.9939
C9_17415652	C9	43.9939
C9_9898806	C9	43.9939
C9_17415486	C9	43.9939
C9_17543067	C9	43.9939
C9_11383434	C9	43.9939
C9_17362738	C9	43.9939
C9_11379700	C9	43.9939
C9_20295022	C9	43.9939
C9_17522696	C9	43.9939
C9_17508982	C9	43.9939
C9_17341286	C9	43.9939
C9_17339974	C9	43.9939
C9_17106538	C9	43.9939
C9_17521917	C9	43.9939
C9_17121219	C9	43.9939
C9_17063067	C9	43.9939
C9_17062915	C9	43.9939
C9_17087335	C9	43.9939
C9_17087319	C9	43.9939
C9_17087436	C9	43.9939
C9_20103302	C9	43.9939
C9_20277260	C9	43.9939
C9_17391112	C9	43.9939
C9_20168004	C9	43.9939
C9_20136927	C9	43.9939
C9_20133745	C9	43.9939
C9_17538756	C9	43.9939
C9_17538618	C9	43.9939
C9_17522426	C9	43.9939
C9_17450637	C9	43.9939
C9_17450578	C9	43.9939
C9_17413907	C9	43.9939
C9_17386406	C9	43.9939
C9_17386355	C9	43.9939
C9_17348616	C9	43.9939
C9_17348466	C9	43.9939
C9_17323019	C9	43.9939
C9_17322872	C9	43.9939
C9_17236801	C9	43.9939
C9_17227874	C9	43.9939
C9_17223990	C9	43.9939
C9_17223903	C9	43.9939
C9_17223845	C9	43.9939
C9_17223819	C9	43.9939
C9_17223635	C9	43.9939
C9_17208070	C9	43.9939
C9_17206531	C9	43.9939
C9_17201936	C9	43.9939
C9_17201722	C9	43.9939
C9_17151329	C9	43.9939
C9_17137216	C9	43.9939
C9_17133240	C9	43.9939
C9_17133107	C9	43.9939
C9_17115122	C9	43.9939
C9_17064138	C9	43.9939
C9_17064031	C9	43.9939
C9_11363019	C9	43.9939
C9_11416270	C9	43.9939
C9_11402779	C9	43.9939
C9_11384524	C9	43.9939
C9_11395008	C9	43.9939
C9_11394840	C9	43.9939
C9_17400011	C9	43.9939
C9_17333287	C9	43.9939
C9_17333168	C9	43.9939
C9_17467902	C9	43.9939
C9_17467870	C9	43.9939
C9_17391907	C9	43.9939
C9_17391906	C9	43.9939
C9_17391894	C9	43.9939
C9_17146431	C9	43.9939
C9_17296262	C9	43.9939
C9_17296058	C9	43.9939
C9_17247203	C9	43.9939
C9_17247190	C9	43.9939
C9_17430747	C9	43.9939
C9_17430954	C9	43.9939
C9_17274538	C9	43.9939
C9_17152181	C9	43.9939
C9_17089247	C9	43.9939
C9_17280315	C9	43.9939
C9_17384443	C9	43.9939
C9_17384370	C9	43.9939
C9_17384283	C9	43.9939
C9_17384276	C9	43.9939
C9_17106558	C9	43.9939
C9_20082652	C9	43.9939
C9_17343605	C9	44.708
C9_17279695	C9	44.708
C9_17423287	C9	44.708
C9_17423254	C9	44.708
C9_11419725	C9	44.708
C9_11418739	C9	44.708
C9_11478229	C9	44.708
C9_17272782	C9	44.708
C9_17272748	C9	44.708
C9_17356685	C9	44.708
C9_17356806	C9	44.708
C9_17189868	C9	44.708
C9_20161213	C9	44.708
C9_17283737	C9	44.708
C9_17107238	C9	44.708
C9_17107174	C9	44.708
C9_17107205	C9	44.708
C9_17289258	C9	44.708
C9_14372736	C9	44.708
C9_14372415	C9	44.708
C9_14348635	C9	44.708
C9_14372439	C9	44.708
C9_20425428	C9	44.708
C9_18957185	C9	45.2827
C9_18933862	C9	45.2827
C9_18933770	C9	45.2827
C9_18949410	C9	45.2827
C9_18949400	C9	45.2827
C9_18954100	C9	45.2827
C9_18954062	C9	45.2827
C9_18931180	C9	45.2827
C9_17935816	C9	45.2827
C9_7641314	C9	47.9875
C9_7641373	C9	47.9875
C9_7639435	C9	48.5899
C9_7639613	C9	48.5899
C9_14350641	C9	48.5899
C9_9630492	C9	49.2842
C9_9433425	C9	49.2842
C9_14606889	C9	51.1598
C9_19747901	C9	51.895
C9_19699910	C9	51.895
C9_19738133	C9	51.895
C9_19668391	C9	51.895
C9_19694717	C9	51.895
C9_19698711	C9	51.895
C9_19728857	C9	51.895
C9_19704495	C9	51.895
C9_19706783	C9	51.895
C9_19706778	C9	51.895
C9_19693083	C9	51.895
C9_20841095	C9	53.3035
C9_20832654	C9	53.3035
C9_20832824	C9	53.3035
C9_20839972	C9	53.3035
C9_20840191	C9	53.3035
C9_20852042	C9	53.3035
C9_20852241	C9	53.3035
C9_20852243	C9	53.3035
C9_20841214	C9	53.3035
C9_20841163	C9	53.3035
C9_20841116	C9	53.3035
C9_20841114	C9	53.3035
C9_20843129	C9	53.3035
C9_20842958	C9	53.3035
C9_20843052	C9	53.3035
C9_20843073	C9	53.3035
C9_20842994	C9	53.3035
C9_20842980	C9	53.3035
C9_20842932	C9	53.3035
C9_18092156	C9	56.0326
C9_18899296	C9	56.0326
C9_18930996	C9	56.0326
C9_16216795	C9	56.0326
C9_12638309	C9	56.0326
C9_12570348	C9	56.0326
C9_12638474	C9	56.0326
C9_12663329	C9	56.0326
C9_12680394	C9	56.0326
C9_12680383	C9	56.0326
C9_12651762	C9	56.0326
C9_12747739	C9	56.0326
C9_12645602	C9	56.0326
C9_17790599	C9	56.0326
C9_12239682	C9	56.0326
C9_12606729	C9	56.0326
C9_22498218	C9	56.0326
C9_12689994	C9	56.0326
C9_12689026	C9	56.0326
C9_12640116	C9	56.0326
C9_12649228	C9	56.0326
C9_12649088	C9	56.0326
C9_17563565	C9	57.6634
C9_17594571	C9	57.6634
C9_12329906	C9	57.6634
C9_12300725	C9	58.339
C9_12308659	C9	58.339
C9_12383005	C9	58.339
C9_12376610	C9	58.339
C9_12339613	C9	58.339
C9_12446269	C9	60.4231
C9_12442530	C9	60.4231
C9_20574162	C9	60.4231
C9_17003890	C9	60.4231
C9_12448704	C9	60.4231
C9_10079463	C9	60.9912
C9_10089945	C9	60.9912
C9_10053140	C9	60.9912
C9_10086524	C9	60.9912
C9_9029228	C9	61.5406
C9_9370023	C9	61.5406
C9_9123699	C9	61.5406
C9_9898911	C9	61.5406
C9_9128619	C9	61.5406
C9_9128593	C9	61.5406
C9_9128580	C9	61.5406
C9_9238298	C9	61.5406
C9_9449083	C9	61.5406
C9_8758512	C9	61.5406
C9_8124542	C9	61.5406
C9_8115407	C9	61.5406
C9_8557402	C9	61.5406
C9_8352336	C9	61.5406
C9_8325334	C9	61.5406
C9_8380053	C9	62.2652
C9_8380105	C9	62.2652
C9_8189849	C9	62.2652
C9_9524499	C9	62.8269
C9_8372599	C9	62.8269
C9_8048557	C9	63.3824
C9_8048689	C9	63.3824
C9_8046158	C9	63.3824
C9_7857398	C9	65.107
C9_7857303	C9	65.107
C9_7857271	C9	65.107
C9_7857255	C9	65.107
C9_7841651	C9	65.6625
C9_7428833	C9	68.0737
C9_7600114	C9	68.6688
C9_7600108	C9	68.6688
C9_7428797	C9	69.2502
C9_7427668	C9	69.2502
C9_7577758	C9	69.2502
C9_8148928	C9	71.1026
C9_9029076	C9	71.6581
C9_8729482	C9	71.6581
C9_8379600	C9	71.6581
C9_8495194	C9	71.6581
C9_8487236	C9	71.6581
C9_8350443	C9	71.6581
C9_8485750	C9	71.6581
C9_8273895	C9	75.4623
C9_8275756	C9	75.4623
C9_8436742	C9	76.0575
C9_8891950	C9	76.6526
C9_9208206	C9	76.6526
C9_9208197	C9	76.6526
C9_9167969	C9	76.6526
C9_9228879	C9	76.6526
C9_9192885	C9	76.6526
C9_9181734	C9	76.6526
C9_9167851	C9	76.6526
C9_9147742	C9	76.6526
C9_9147736	C9	76.6526
C9_8842419	C9	76.6526
C9_9148330	C9	76.6526
C9_9226647	C9	76.6526
C9_9198943	C9	76.6526
C9_9180938	C9	76.6526
C9_9176601	C9	76.6526
C9_9178102	C9	76.6526
C9_9178138	C9	76.6526
C9_9229381	C9	76.6526
C9_8698779	C9	76.6526
C9_9136538	C9	76.6526
C9_9229466	C9	76.6526
C9_9213685	C9	76.6526
C9_8481262	C9	78.1233
C9_11566719	C9	81.7001
C9_21500082	C9	84.3333
C9_11663002	C9	84.3333
C9_21399260	C9	84.3333
C9_21418514	C9	84.3333
C9_21397985	C9	84.3333
C9_21415479	C9	84.3333
C9_21415377	C9	84.3333
C9_21415418	C9	84.3333
C9_21415312	C9	84.3333
C9_21392317	C9	84.3333
C9_21407135	C9	84.3333
C9_22559102	C9	84.3333
C9_21407136	C9	84.3333
C9_22480627	C9	84.3333
C9_21436821	C9	84.3333
C9_20819170	C9	85.5833
C9_21189984	C9	85.5833
C9_20841134	C9	85.5833
C9_20795211	C9	86.7328
C9_21245569	C9	86.7328
C9_21376982	C9	86.7328
C9_20776592	C9	86.7328
[truncated: 1,145 more rows]
